# Supplementary material
Source: HighWire-hosted journal article supplement (https://www.cmajopen.ca/highwire/filestream/89596/field_highwire_adjunct_files/0/open-2022-0070-1-at.pdf)
Supplement: open-2022-0070-1-at.pdf [file open-2022-0070-1-at.pdf]

**Supplemental File A – ICD-10 Codes Signifying a Life-Threatening Condition<sup>16,17</sup>**

| Neurology   |             | Haematology | Oncology | Metabolic  | Respiratory | Circulatory | GI*   | GU*   | Peri-natal | Congenital  |       | Other |
|-------------|-------------|-------------|----------|------------|-------------|-------------|-------|-------|------------|-------------|-------|-------|
| A17         | G60.0       | B20-B24     | C00-C97  | E31.0      | E84         | I21         | K55.0 | N17   | P5         | Q00-Q07     | Q92.4 | H11.1 |
| A81.0       | G60.1       | D56.1       | D33      | E34.8      | G47.3       | I27         | K55.9 | N18   | P7.0       | Q20         | Q92.7 | H49.8 |
| A81.1       | G70.2       | D61.0       | D43      | E70.2-70.4 | J84.1       | I42-I45     | K72   | N19   | P7.2       | Q21.2-Q24   | Q92.8 | H35.5 |
| F71-F73     | G70.9       | D61.9       | D44.4    | E71        | J96         | I50.9       | K74   | N25.8 | P10.0      | Q25.1-Q26   | Q93   | M31.3 |
| F84.2       | G71.0-G71.3 | D70         | D48      | E72        | J98.4       | I51.5       | K76.5 |       | P10.1      | Q28.2       | Q95.0 | M32.1 |
| G10         | G71.8       | D76.1       |          | E74-E78    |             | I51.7       | K86.8 |       | P10.4      | Q28.3       | Q95.2 | M33.9 |
| G11.1-G11.4 | G71.9       | D81         |          | E79.1      |             | I51.8       |       |       | P11.2      | Q28.9       | Q96.9 | M34.0 |
| G11.8       | G72         | D82.1       |          | E83.0      |             | I61.3       |       |       | P11.5      | Q30-34      |       | M35.9 |
| G11.9       | G80         | D83         |          | E88        |             | I63.1       |       |       | P21.0      | Q39.0-39.4  |       | M89.5 |
| G12         | G81.9       | D89.1       |          |            |             | I63.2       |       |       | P21.9      | Q39.6       |       | T86.0 |
| G20         | G82.3-G82.5 |             |          |            |             | I63.3       |       |       | P25        | Q41-Q45     |       | T86.2 |
| G21.0       | G82.9       |             |          |            |             | I63.5       |       |       | P28.0      | Q60-Q64     |       | Z51.5 |
| G21.1       | G83.5       |             |          |            |             | I81         |       |       | P28.5      | Q74.3       |       |       |
| G21.8       | G83.9       |             |          |            |             |             |       |       | P29.0      | Q75.0       |       |       |
| G23.0-G23.2 | G90.1       |             |          |            |             |             |       |       | P29.3      | Q76.1       |       |       |
| G23.8       | G90.9       |             |          |            |             |             |       |       | P35.0      | Q77         |       |       |
| G24.0       | G91.1       |             |          |            |             |             |       |       | P35.1      | Q78         |       |       |
| G24.8       | G93.1       |             |          |            |             |             |       |       | P35.8      | Q79.0-Q79.5 |       |       |
| G25.3-G25.5 | G93.4-G93.9 |             |          |            |             |             |       |       | P37.1      | Q79.9       |       |       |
| G25.8       | G94         |             |          |            |             |             |       |       | P52.4      | Q80.4       |       |       |
| G25.9       | G95.1       |             |          |            |             |             |       |       | P52.5      | Q81         |       |       |
| G31.0       | G95.8       |             |          |            |             |             |       |       | P52.8      | Q82.1       |       |       |
| G31.8       |             |             |          |            |             |             |       |       | P52.9      | Q82.4       |       |       |
| G31.9       |             |             |          |            |             |             |       |       | P56.0      | Q85.1       |       |       |
| G32.8       |             |             |          |            |             |             |       |       | P57        | Q85.8       |       |       |
| G35         |             |             |          |            |             |             |       |       | P61.3      | Q86.0       |       |       |
| G37.1       |             |             |          |            |             |             |       |       | P61.4      | Q87.0-87.4  |       |       |
| G37.2       |             |             |          |            |             |             |       |       | P77        | Q87.8       |       |       |
| G37.8       |             |             |          |            |             |             |       |       | P83.2      | Q89.7       |       |       |
| G40.1-G40.5 |             |             |          |            |             |             |       |       | P91.2      | Q89.9       |       |       |
| G40.8       |             |             |          |            |             |             |       |       | P91.6      | Q91         |       |       |
| G40.9       |             |             |          |            |             |             |       |       | P96.0      | Q92.0-92.2  |       |       |

\*GI = Gastrointestinal; GU = Genitourinary
